# Supplementary material
Source: Elsevier journal article supplement (https://comptes-rendus.academie-sciences.fr/geoscience/article/10.1016/j.crte.2016.02.002/file/attach/mmc2.pdf)

SM 2. Main stratigraphic microfossils from Borehole CDB1 – benthic foraminifera. 1. *Clavulina parisiensis* (D'ORBIGNY). 2. *Arenagula kerfornei* (ALLIX). 3. *Valvulammina globularis* (D'ORBIGNY). 4. *Valvulina triedra* (LE CALVEZ). 5. *Peneroplis armorica* (D'ARCHIAC in TOURNOUER). 6. *Neorotalia viennoti* (GREIG). 7. *Virgulopsis kasselensis* (BATJES). 8. *Bolivina beycheri* (REUSS). 9. *Elphidium crispum* (LINNAEUS). 1 to 4: Bartonian. 5–8: Rupelian. 9: Middle Miocene.

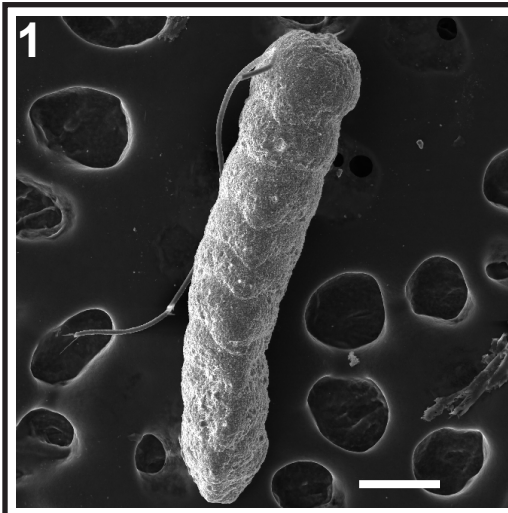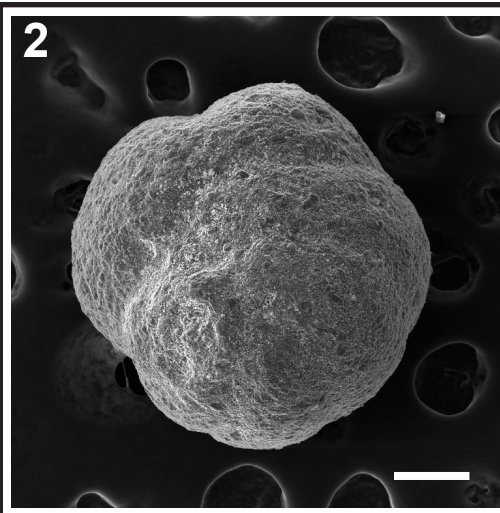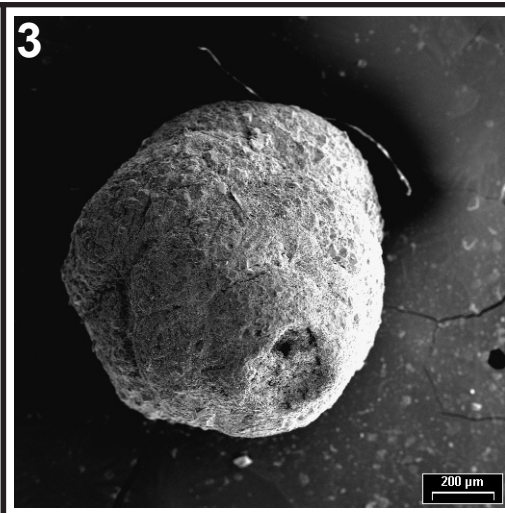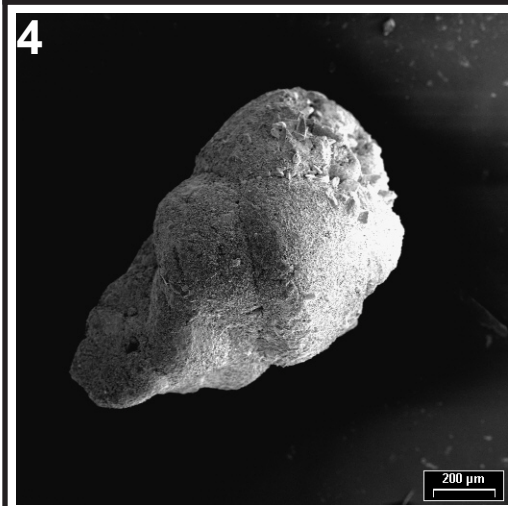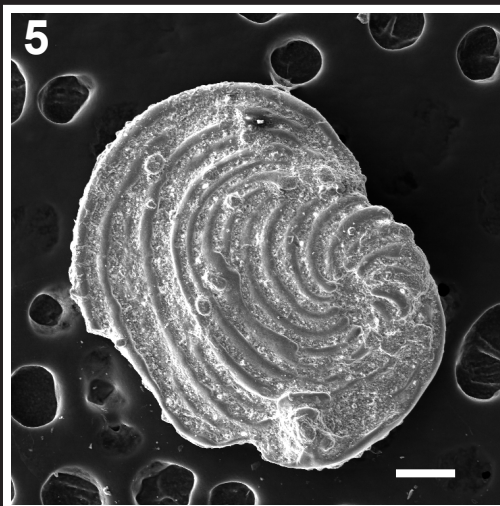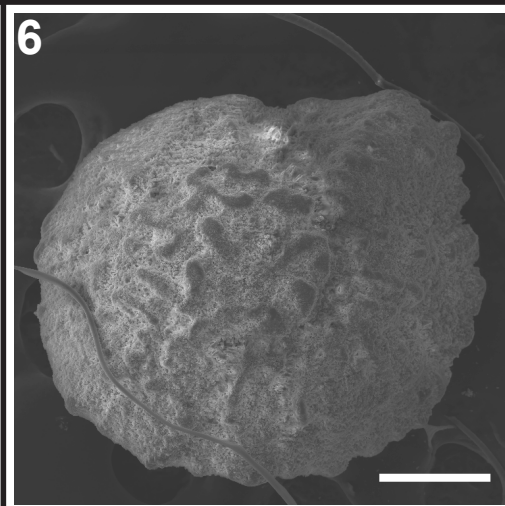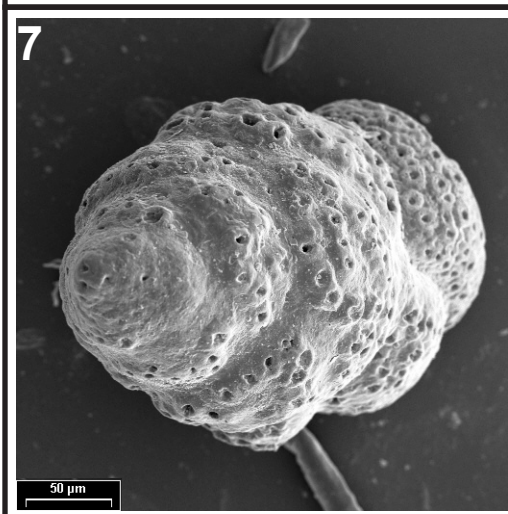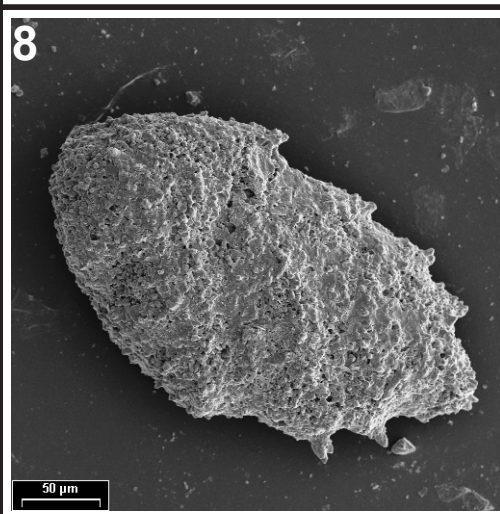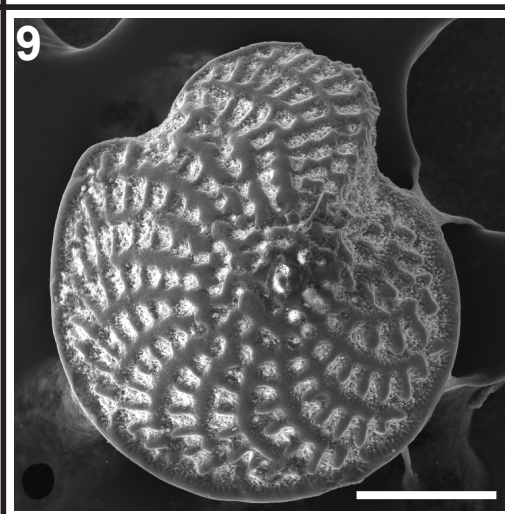

Supplement: mmc2 [file mmc2.pdf]
